# Supplementary material for: Nitrogen, phosphorus co-doped carbon dots/CoS2hybrid for enhanced electrocatalytic hydrogen evolution reaction
Source: Royal Society of Chemistry journal article supplement (doi:10.1039/c6ra11396f), 2016-01-01
Supplement: c6ra11396f1.pdf [file c6ra11396f1.pdf]

# Nitrogen, phosphorus co-doped carbon dots/CoS<sub>2</sub> hybrid for enhanced electrocatalytic hydrogen evolution reaction

## Supporting information

Liping Wang, Shunyan Zhao, Xiuqin Wu, Sijie Guo, Juan Liu, Naiyun Liu, Hui Huang, Yang Liu, and Zhenhui Kang

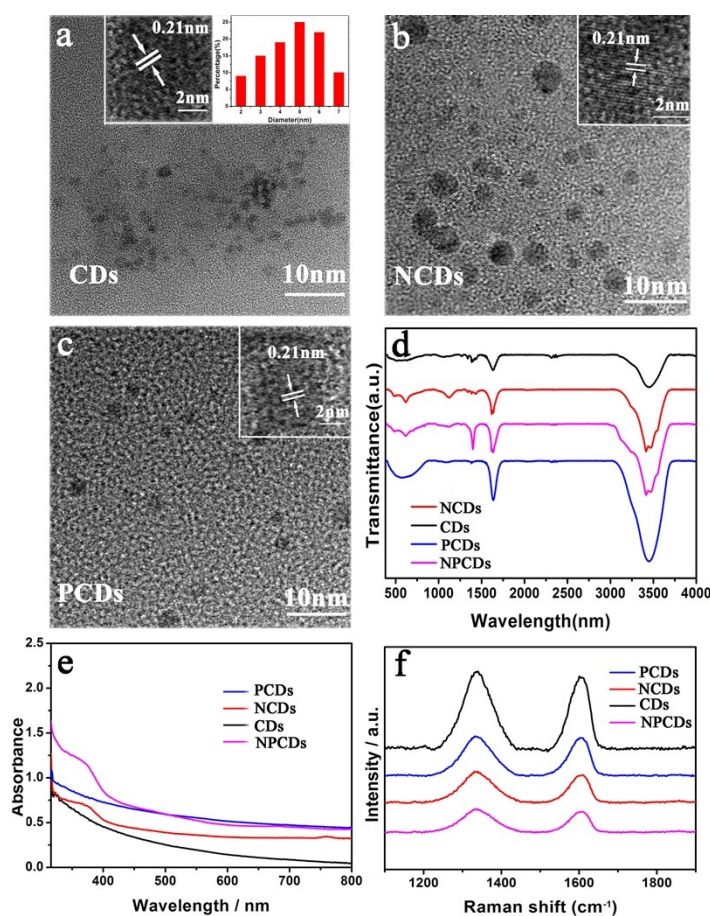

**Fig. S1** (a-c) TEM and HRTEM images of CDs, NCDs and PCDs. The insets in (a) are the corresponding HRTEM image and particle-size histogram of CDs. FT-IR spectra (d), UV-Vis absorption spectra (e), Raman spectra (f) of CDs, NCDs, PCDs and NPCDs (black trace, red trace, blue trace, and pink trace, respectively).

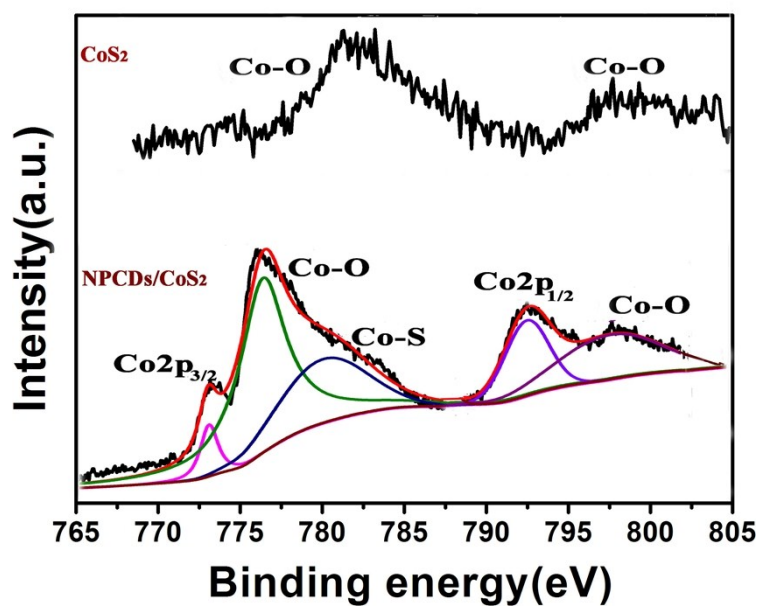

**Fig. S2** High resolution XPS spectra of Co 2p in CoS<sub>2</sub> and NPCDs/CoS<sub>2</sub>.

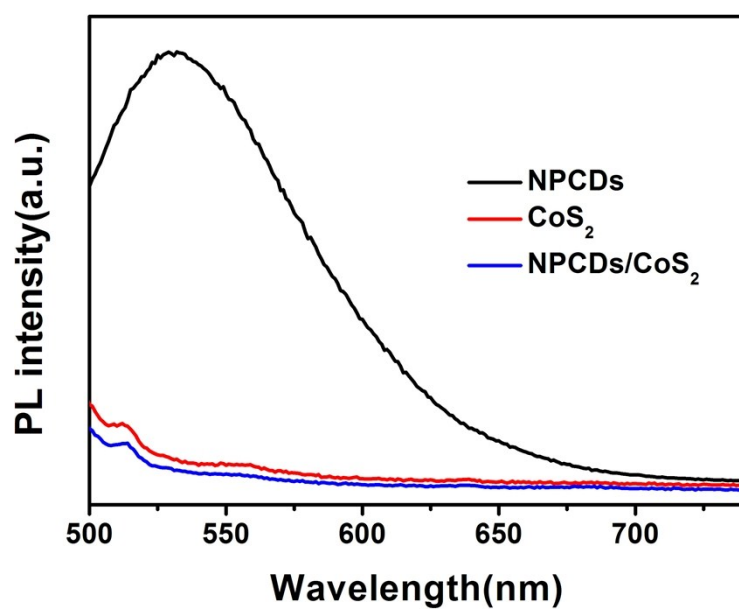

**Fig. S3** PL spectra of NPCDs, CoS<sub>2</sub>, and NPCDs/CoS<sub>2</sub>.

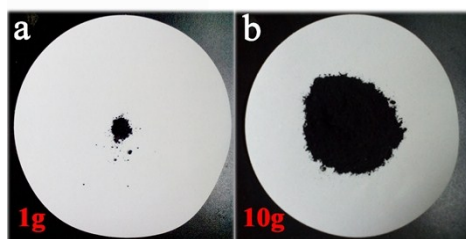

**Fig. S4** The digital photos of different electrocatalyst yields (including 1 g and 10 g).

**Table S1.** Faradaic yields of H<sub>2</sub> production with NPCDs/CoS<sub>2</sub> at different overpotentials during 3600 s.

| $\eta$ (mV) | Amount of H <sub>2</sub> (mmol) | $Q_{\text{Theoretical}}$ (C) | Faradaic yield (%) |
|-------------|---------------------------------|------------------------------|--------------------|
| 140         | 0.04                            | 8.47                         | 91.00              |
| 160         | 0.07                            | 14.63                        | 92.20              |
| 180         | 0.09                            | 18.32                        | 94.60              |

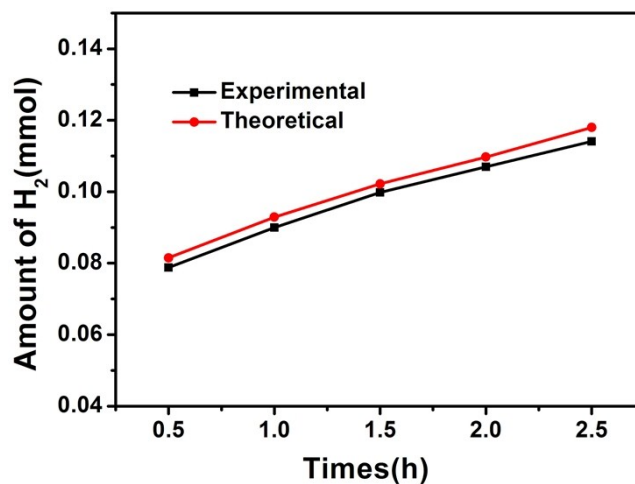

**Fig. S5** Faradaic yields (both experimentally measured and theoretically calculated) of H<sub>2</sub> production versus time with NPCDs/CoS<sub>2</sub> at overpotential ( $\eta$  = 180 mV) for 2.5 h in 0.5 M H<sub>2</sub>SO<sub>4</sub>.
